August 2011

# PSYCHIATRIC SERVICES

A Journal of the  
American Psychiatric  
Association

- ◆ Loss of Insurance by People With Psychoses: Who Pays the Price?
- ◆ How to Be Adherent: Listening to Patients' Medication Stories
- ◆ Is Colocation of Services an Effective Care Model? A Nationwide VA Study
- ◆ Preliminary Program for the 2011 Institute on Psychiatric Services

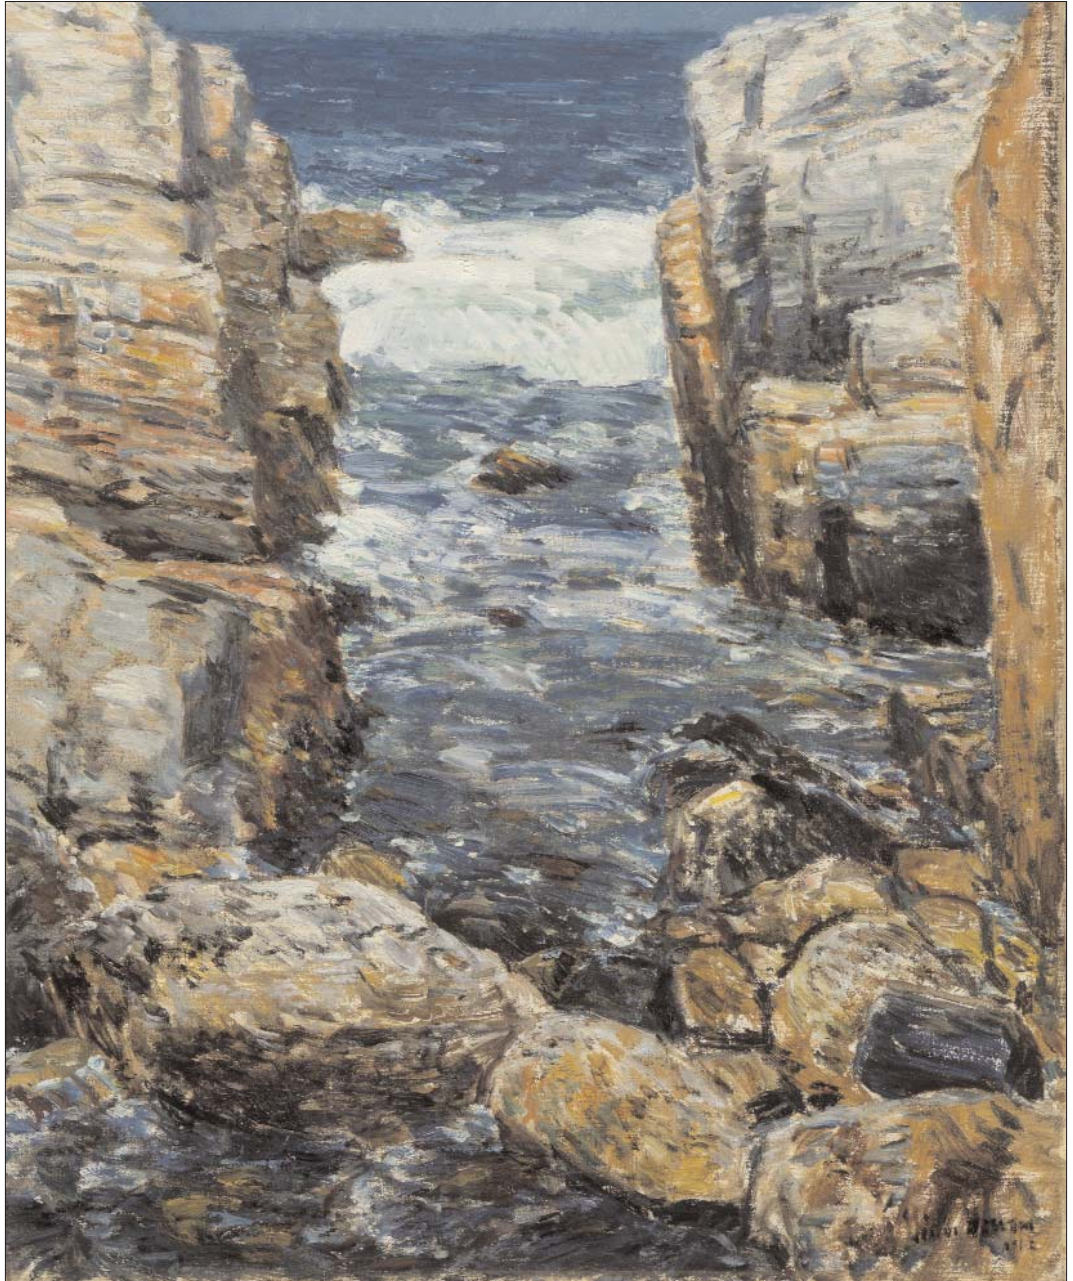

Source: https://psychiatryonline.org/doi/suppl/10.1176/ps.2011.62.issue-8/suppl_file/cover.pdf
